# Supplementary material for: Surface current variability in the East Australian Current from long-term HF radar observations
Source: Copernicus journal article supplement (doi:10.5194/essd-2024-480), 2024-10-30
Supplement: Supplementary file [file essd-2024-480-AC3-supplement.pdf]

### # Reviewer 3

We greatly appreciate the constructive comments from the Reviewer. Below we provide our detailed point-by-point responses and any description of actions taken regarding the comments by the Reviewer.

Line 2 I question the phrase decadal fluctuations, they have only recorded 8 years of data

**Answer:** Thank you for pointing this out. In this context, we referred to the variability of the EAC as observed in previous studies (not the results of this study). The EAC has been an important subject for study for a long period, e.g., seasonal, interannual (Sloyan et al., 2016), decadal (Hill et al., 2011), and long-term (Oliver et al., 2015), etc. For clarity, we have changed the phrase decadal fluctuations to long-term fluctuations which we believe that is more suitable.

Line 25 “intricate flow patterns” can you describe more

**Answer:** We have added the text “(e.g. frontal eddies and filaments)” here.

Line 57 Tasman Front moves towards

**Answer:** We have corrected the text as follows:

“here part of the jet separates from the coast, shedding eddies that flow eastward forming the EAC eastern extension of and those that continue southward form the EAC southern extension”

Line 63 capitalize Integrated Marine Observation System

**Answer:** We have corrected the text as required.

Line 79 unweighted least-squares (Lipa reference) Lipa, B., and D. Barrick. "Least-squares methods for the extraction of surface currents from CODAR crossed-loop data: Application at ARSLOE." IEEE Journal of Oceanic Engineering 8, no. 4 (1983): 226-253.

**Answer:** Thank you for this suggestion. We have added the citations to the revised manuscript and made the reference to the text.

Line 86 what does the (2) refer to?

**Answer:** Thank you for pointing this out. This was a typo and was removed from the revised manuscript.

Line 126 remove “land based”

**Answer:** The phrase was removed in the revised manuscript.

Line 140 CODAR Ocean Sensors

**Answer:** The phrase was corrected in the revised manuscript.

Line 149 sentence ends with preposition from, please fix

**Answer:** The sentence was rewritten as follows: “As the transmitted radio wave is reflected back to the radar from all directions, the WERA-manufactured radar uses the beam-forming method to determine the position of the signal”.

### Line 153 direction finding

**Answer:** The phrase was corrected in the revised manuscript.

Table 1 the formatting of the table could be improved. Can you add lines for each row. I think this would make it easier to read.

**Answer:** We have modified the Table 1 as required. Lines were added in each row for clarity. However, we note this may be changed by the journal at the typesetting stage.

Figure 1 I think you should separate the coverage maps for the COF network and RHED network since the length of time they were operating were so different.

**Answer:** Thank you for your comment. Indeed, the coverage maps in Fig. 1b were plotted separately for each radar site during their operating periods: COF radar was from 01 March 2012 to 01 January 2021 and NEWC radar from 01 November 2017 to 01 January 2024.

New text has been added to clarify this point in the Fig. 1 caption for better clarification as follows: “Maps of the mean spatial coverage (as a ratio from 0 to 1) were plotted separately for the two sites; COF (01 March 2012 - 01 January 2021) and NEWC (01 January 2018 - 01 January 2024)”

The colormap for Figure 1a should be changed to cmocean speed.

**Answer:** We acknowledge that the cmocean delta was indeed an odd choice for plotting the ocean current maps. However, the high contrast between low and high values in the cmocean delta allows for better visualization of the EAC and the coastal region than the speed colormap. Here, we empirically chose the value of  $0.6 \text{ m s}^{-1}$ , which is demonstrated by the white band in this colormap, as the boundary of the EAC. In this way, the strong and weak current regions are well separated by the blue and green color bands, respectively. The benefit of using the cmocean delta colormap is the EAC can be well recognized in the radar-derived current maps, as shown in Fig. 1 as well as in Fig. 3, Fig. 8, and Fig. 9.

Line 163 what does FV00 mean,

**Answer:** FV00 here refers to the radar real-time products with a basic quality controlled which are publicly available on the AODN website (<https://thredds.aodn.org.au/thredds/catalog/IMOS/ACORN/catalog.html>). The more enhanced data (FV01) data is provided at the delay of few months (Cosoli and Grcic, 2019). In our study, the FV01 data for the NEWC were only available for two years 2018 and 2019, therefore, we had to apply the QC to our NEWC radar data as the guidance from Cosoli and Grcic (2019).

The text was modified for clarity as follows: “In the real-time product, an IMOS standard quality control procedure was applied to remove the data outliers from the original radial data (FV00). A more comprehensive quality control (QC) procedure is then applied to the FV00 data to create a more accurate product, which is published to the AODN server after a delay of a few months and flagged as FV01 as per (Cosoli and Grcic, 2019)”

can you explain more Figure 2 why did the coverage decrease at RRK and NNB starting in 2021

**Answer:** Since 2021, the Red Rocks (RRK) and North Nambucca (NNB) radars have experienced several hardware issues related to antennas, cables, hardware, and site computers. These issues affected radar operations, reducing the coverage of both radars. Consequently, both radar sites were partially or non-operational for the past three years. This has been added to the text.

Line 189 remove sentence “The drifters will be described more ...”

**Answer:** The phrase was removed in the revised manuscript.

Line 201 Each SVP drifter

**Answer:** The phrase was corrected in the revised manuscript.

Line 243 is the equation needed?

**Answer:** We also questioned whether including a complex equation in the manuscript was useful. However, since this is a data description paper, the method for creating the data should be clear. Therefore, we decided to leave the equation in the manuscript to give the readers a general view of the 2dVar approach used in this study. Additionally, we provide a sample script along with this paper for those who are interested.

Line 255 independent validation dataset, which is?

**Answer:** The validation dataset was the cross-validation points that set aside from the radial data for each of the radar site. In total, there were respectively about 1,160 and 1,189 snapshots for NEWC and COF radar. From there, roughly around 2% of total points (for example 550,599 points in total of 27,529,950 from 1,160 snapshots in NEWC) were chosen to compare with reconstructed values.

To validate the method, the total velocities reconstructed from the remained data were interpolated on those cross-validation points. The radial velocities computed from the reconstructed total velocities were then compared with the original dataset that set aside in the first step. The results of comparison are shown in Table 2 with different scenarios of data gaps.

To avoid confusion, we have also revised the sentences as follows: “These analyzed current vectors were then interpolated onto the locations corresponding to the cross-validation points, facilitating the evaluation of the accuracy of the analysis”

Line 270 comparison was

**Answer:** The phrase was corrected in the revised manuscript.

Line 303 what were the validation points

**Answer:** This is also in line with the above question in Line 255. The RMSE in Fig. 4 was computed from the comparison at every cross-validation point that set aside at the beginning of the validation. The result in Fig. 4 was averaged over 1,160 snapshots for the NEWC radar.

Line 308 imbalance of radar observations, please explain more

**Answer:** We believe this is a good point for discussion. The imbalance of radar observations here refers to the number of radial data from both sites when they are used to combine a total velocity in the single snapshot. For the radial balance distribution test in this study, we applied the guidance from IMOS procedure (Cosoli and Grcic, 2019) in which the ratio of the radial observations between site 1 (NOBS1) and site 2 (NOBS2) are equal ( $\text{NOBS1} = \text{NOBS2}$ ) or not significantly different ( $1 < \text{NOBS1}/\text{NOBS2} < 10$ ).

The uncertainty of the total velocity can be attributed to multiple factors, such as errors in radial data, the number of radial data points used, and the Geometrical Dilution of Precision (GDOP), etc. Indeed, the analysis domain for the NEWC region was carefully chosen to lie within an area of good GDOP values, minimizing errors as much as possible (Fig. 3c, d). Additionally, Fig. 4 shows high RMSEs ( $> 15 \text{ cm s}^{-1}$ ) along the radial beam of the northern radar site, while lower RMSEs ( $5\text{--}8 \text{ cm s}^{-1}$ ) were found for the southern site. Normally, we would expect the northern radar site to have better accuracy since the mean circulation indicated that the EAC pathway is parallel to the northern radial beam (Fig. 1a). Initially, we thought the imbalance in radial data was responsible for the high error in total velocity reconstruction. However, the local circulation in this region is also influenced by the energetic, large-scale circulation, causing rapid changes in the local circulation regime (e.g., Fig. 4 in Malan et al. (2023)). This led us to believe that the large errors at the northern site in the offshore region were not only due to the imbalance of radar observations but caused by multiple factors, including radar uncertainties, the location of the northern sites, and the complex dynamics of the region.

For clarity we have improved the text as follows: “Note that higher velocity errors are found off the region of the SEAL radar site toward the offshore region. This significant offshore discrepancy coincides with the highly energetic region of the EAC pathway (Fig. 3c, d). The local circulation in this region is also influenced by the energetic, large-scale circulation, causing rapid changes in the local circulation regime (e.g., Fig. 4 in Malan et al. (2023)). The large errors in the offshore region were likely due to multiple factors, including radar uncertainties, the location of the northern sites, and the complex dynamics of the region.”

**Line 352 can you explain “resulting in reversal” more**

**Answer:** The texts have been revised for clarity as follows: “The lack of a drogue in the CARTHE drifter increases its sensitivity to Stokes drift (Novelli et al., 2017), causing the offshore CARTHE to closely follow the wind direction (Fig. 5d). This behavior contrasts with that of the SVP drifter and radar-derived current vectors. (Fig. 5e)”

**Table 3 theta phase difference, can you explain more**

**Answer:** Based on the analysis with  $\theta$  values, we noticed that the deviation of the radar-derived and drifter vectors for both methods (LS and 2dVar) was quite satisfied, about 5 degrees. A large deviation of  $\theta$  was found for the near-shore group deployed in 2020 ( $-3.9$  and  $4.1$  for LS and 2dVar, respectively) which we believed was due to the drifters travelling close to the baseline between two radars. Along with the good correlation and RMSE values, it convinced us to use the method for reconstructing the radar dataset.

Other than that, the  $\theta$  contains the information about the dynamics of the surface (CARTHE,  $\sim 0 - 0.4$  m) and subsurface (radar,  $\sim 2.4$  m and SVP,  $\sim 15$  m). In general, we found a more consistent of  $\theta$  for radar-derived and SVP vectors (Table 4) during two campaigns, which generally agrees with the Ekman theory about rotation of current from surface to depth. The  $\theta$  values between CARTHE drifters and radar-derived vectors, however, were varied between two campaigns (e.g.,  $-0.9$  in 2020 and  $8.1$  in 2023 for undrouge CARTHE and 2dVar current vectors). This variation can be related to the wind force since most of our drifters used in this study were the undrouged drifters, which were more sensitive to the surface wind. The behavior of the drifters and the dynamics of the near-surface layer was our point of discussion in the section 5.1.

Table 4 can you make the gap filling 2dvar data its own section, so you'll have LS, 2dVar and 2dVar gap filled as the 3 main columns

**Answer:** Thank you for your suggestion. Table 4 had been revised.

Line 446 radar-derived currents

**Answer:** The phrase was corrected in revised manuscript.

Line 484 I thought the COF data was 8 years?

**Answer:** In this section, we referred to the work of Archer et al. (2017a), who used COF radar data to analyse EAC dynamics. However, only four years of COF radar data (2012 to 2016) were used for the Archer analysis. To avoid confusion, we have modified the text: "Archer et al. (2017a), using the jet-following method and COF radar data from 2012 to 2016, revealed that the EAC magnitude and its associated variance follow a seasonal pattern, peaking during summer".

Figure 8 the ellipses over the vectors are hard to read, can you separate

**Answer:** See next comment

Figure 9 Can you group the panels by season summer (Dec, Jan, Feb) etc.

**Answer:** We have modified the Fig. 8 and Fig. 9 in the revised manuscript. Following the suggestion, we have reduced the intensity of the ellipses and increased the ellipse scale for clarity. The monthly mean currents maps are now sorted in each column which represents the austral summer to spring.

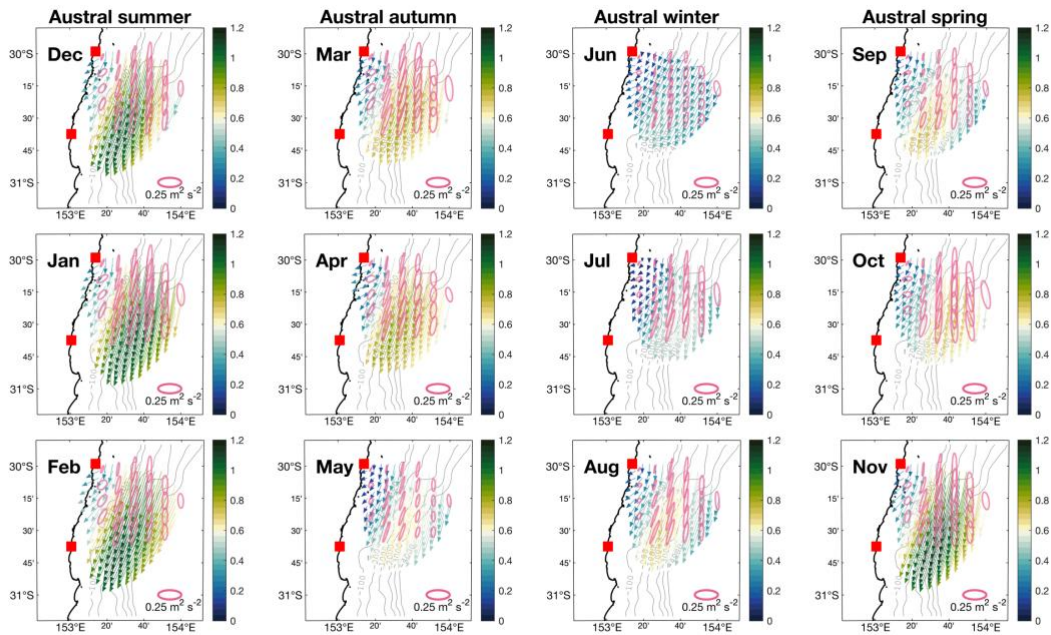

Figure 8. Maps showing the monthly mean radar-derived current vectors at Coffs Harbour (upstream) using hourly data from the COF radar from March 2012 to January 2021. The monthly mean currents maps are organized by seasons in each column. The velocity unit is  $\text{m s}^{-1}$ . The current velocity variances are illustrated by plotting ellipses at 6-grid point intervals for visualization. The bathymetry contours are plotted at 100, 200, 1000, 2000, 3000 and 4000 m levels.

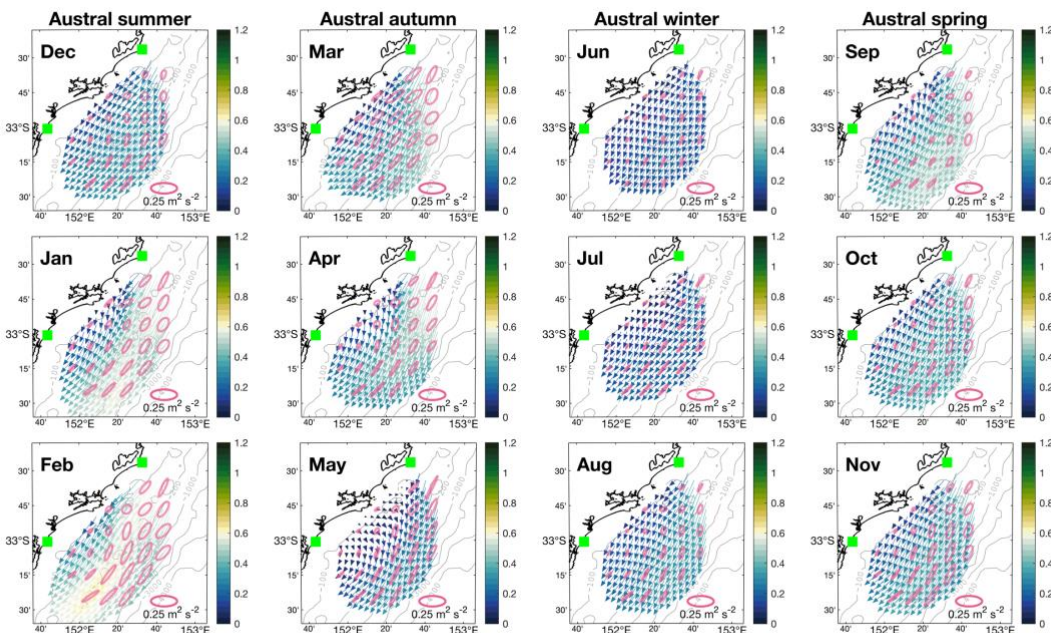

Figure 9. Maps showing the monthly mean radar-derived current vectors off Newcastle using hourly data from the NEWC radar from November 2017 to February 2024. The monthly mean currents maps are organized by seasons in each column. The velocity unit is  $\text{m s}^{-1}$ . The current velocity variances are illustrated by plotting ellipses at 2-grid

point intervals for visualization. The bathymetry contours are plotted at 100, 200, 1000, 2000, 3000 and 4000 m levels.

Fig 11 can you color the months by season summer (black), fall (red), winter (blue), spring (green)

Line 498 the widening jet, can you explain that more, I don't see it in Fig 11

**Answer:** Fig. 11 has been revised. Now the mean EAC core velocities for each month were plotted separately for clarity.

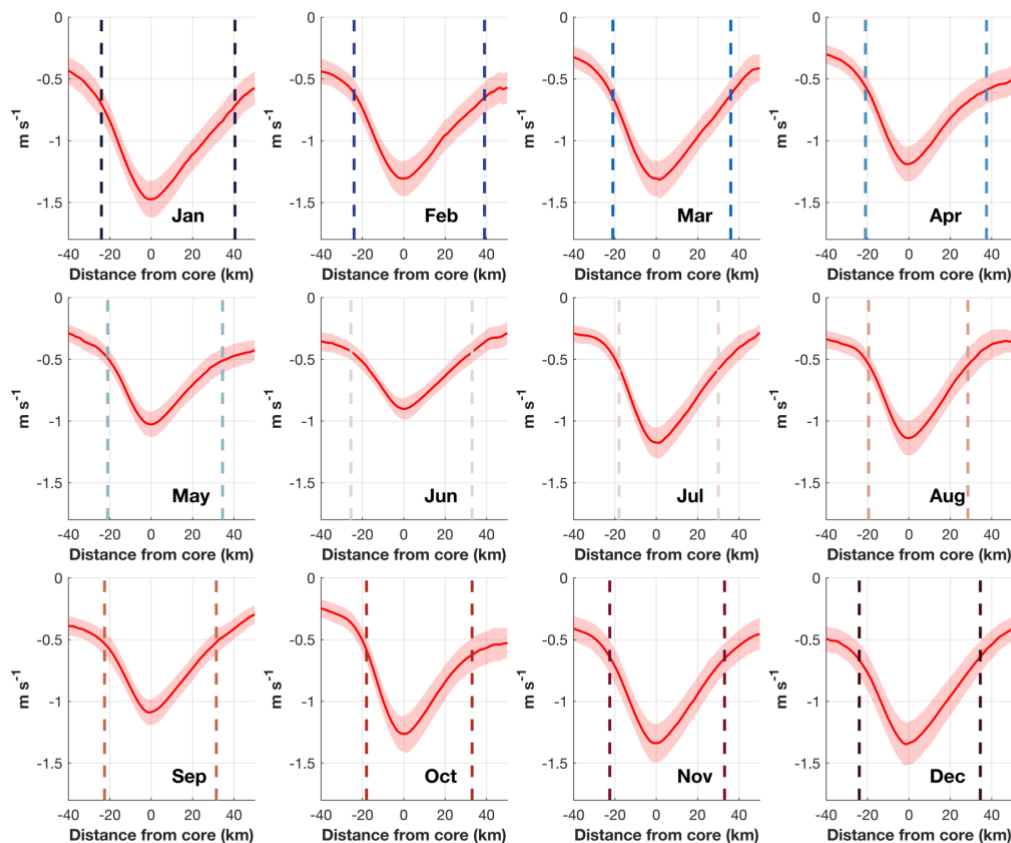

Figure 11. Annual cycle of the EAC cross-structure identified from the jet-following method (Archer et al., 2017b) based on 8 years of Coff Harbour (COF) data. A positive value indicates the southward movement of the jet. Cross-structure of the jet is averaged  $30.2^{\circ} - 30.6^{\circ}\text{S}$ . Red lines represent the mean poleward magnitude of the EAC across the jet. Shading areas represent one standard deviation from the mean speed. Dash lines mark the boundary of the EAC, defined as points with a 50% reduction from the core velocity.

Line 508 mooring and radar data

**Answer:** The phrase was corrected in the revised manuscript.

Line 535 within the range of \_\_\_ cm/s , missing number

**Answer:** We apologize for this mistake, the values were added and the sentence was corrected as follows: “Kirincich et al. (2019) compared the 25 MHz HF radar in the Martha’s Vineyard with the CODE drifter found the RMSE within the range of 5 to 10 cm s<sup>-1</sup> in the center while the error up to 20 cm s<sup>-1</sup> were found at the outer edge of the radial coverage and correlation of around 0.73”.

Line 609 I disagree with the statement that the radar datasets have certain inherent limitations, if one of the radar stations goes offline, then you lose totals. That is a limitation in the design of the observing system, not the radar technology. Redundant coverage would eliminate this limitation

**Answer:** Thank you for your suggestion. We agree with this. The text was removed from the revised manuscript.
